# Supplementary material for: Development of a multicellular 3D-bioprinted microtissue model of human periodontal ligament-alveolar bone biointerface: Towards a pre-clinical model of periodontal diseases and personalized periodontal tissue engineering
Source: PubMed Central journal article supplement — Genes Dis. 2020 Nov 28;9(4):1008–23. doi: 10.1016/j.gendis.2020.11.011 (PMC9170773; doi:10.1016/j.gendis.2020.11.011), 2020-11-28
Supplement: mmc1.pdf [file mmc1.pdf]

# Development of a multicellular 3D-bioprinted microtissue model of human periodontal ligament-alveolar bone biointerface: Towards a pre-clinical model of periodontal diseases and personalized periodontal tissue engineering

Vurat M. T., Şeker Ş., Lalegül-Ülker Ö., Parmaksız M., Elçin A. E., Elçin Y. M.

## Supplementary Materials

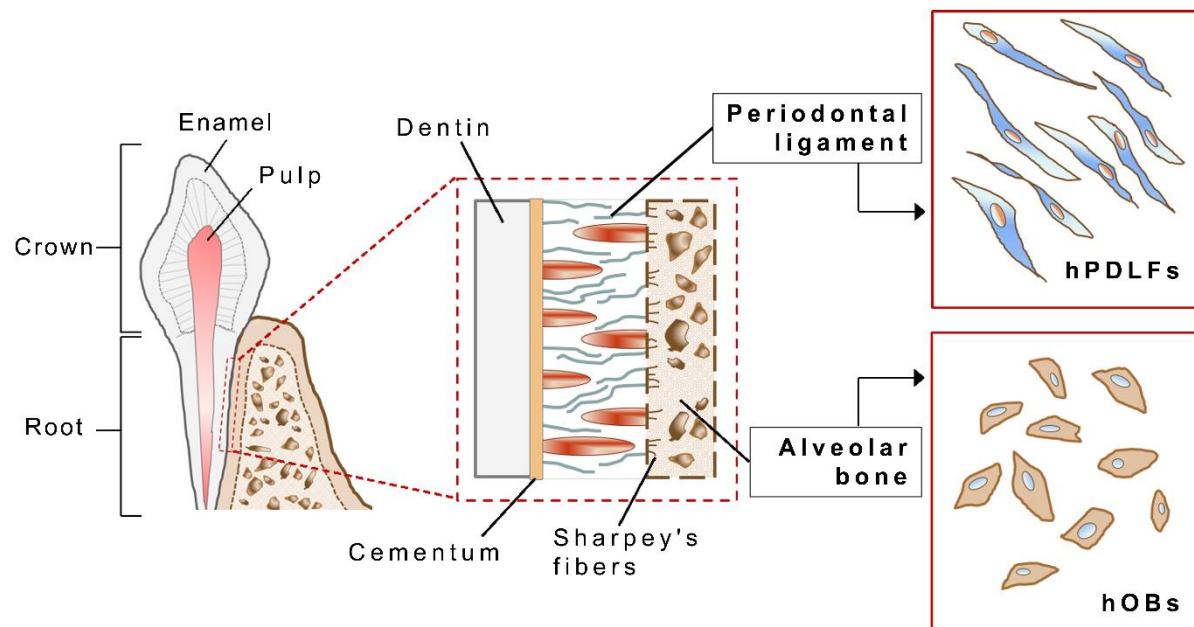

**Fig. S1.** Illustration of tooth and the surrounding tissues, including periodontal ligament (PDL) and alveolar bone (AB). The PDL-AB (periodontal/osteoblastic) biointerface is modeled by using the hPDLFs and hOBs.

**Development of a multicellular 3D-bioprinted microtissue model of human periodontal ligament-alveolar bone biointerface: Towards a pre-clinical model of periodontal diseases and personalized periodontal tissue engineering**

Vurat M. T., Şeker Ş., Lalegül-Ülker Ö., Parmaksiz M., Elçin A. E., Elçin Y. M.

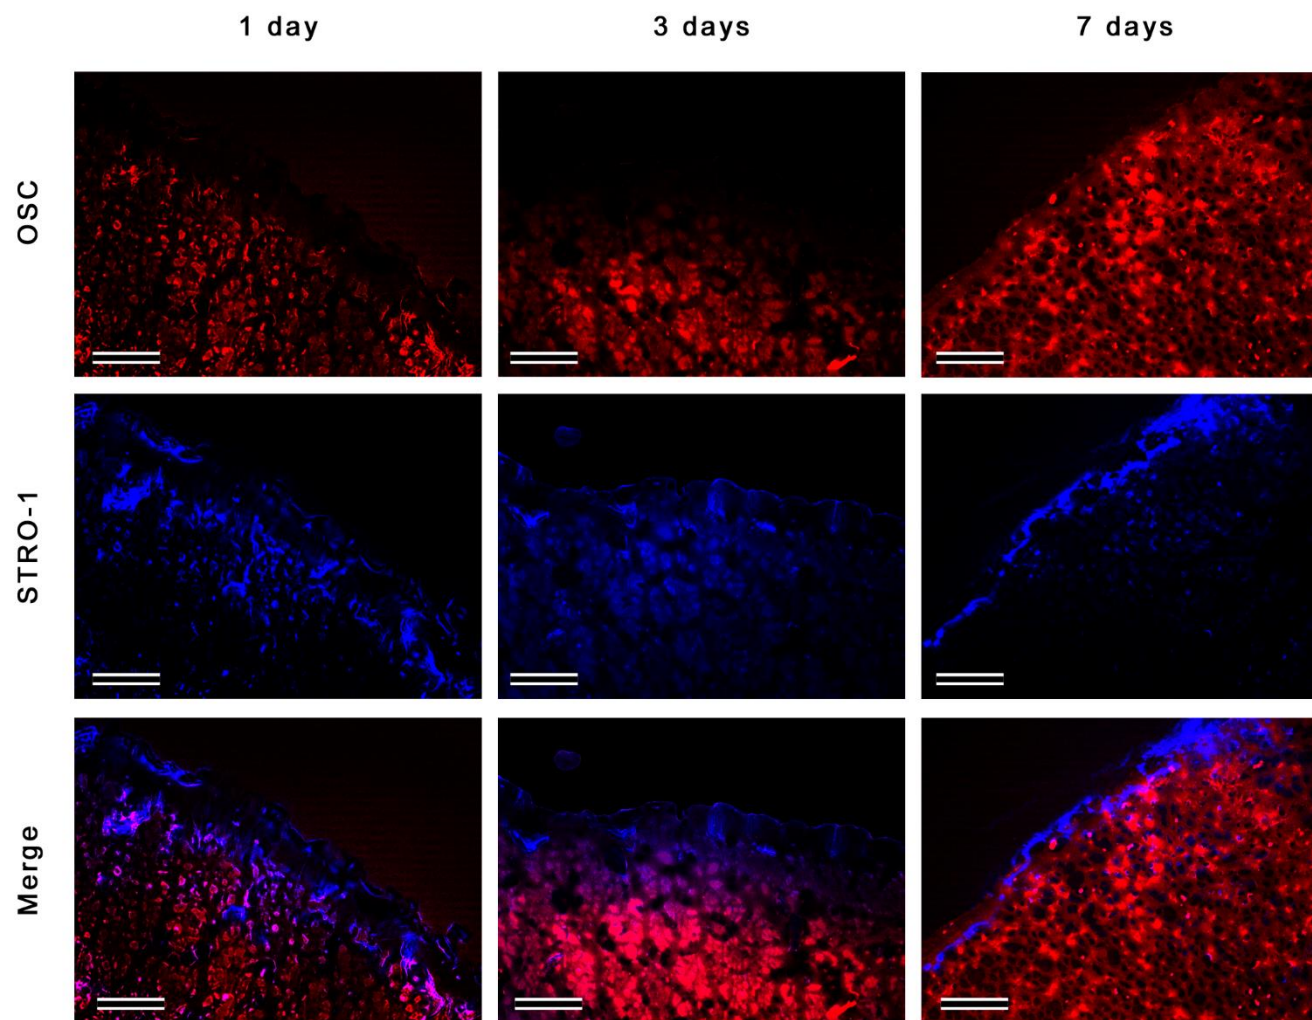

**Fig. S2.** Immunofluorescence micrographs demonstrating the 3D-bioprinted periodontal (containing STRO-1+ hPDLF cells) and osteoblastic (containing OSC+ hOBs) layers, separately and merged (top view). Scale bars= 100 µm.

## Development of a multicellular 3D-bioprinted microtissue model of human periodontal ligament-alveolar bone biointerface: Towards a pre-clinical model of periodontal diseases and personalized periodontal tissue engineering

Vurat M. T., Şeker Ş., Lalegül-Ülker Ö., Parmaksiz M., Elçin A. E., Elçin Y. M.

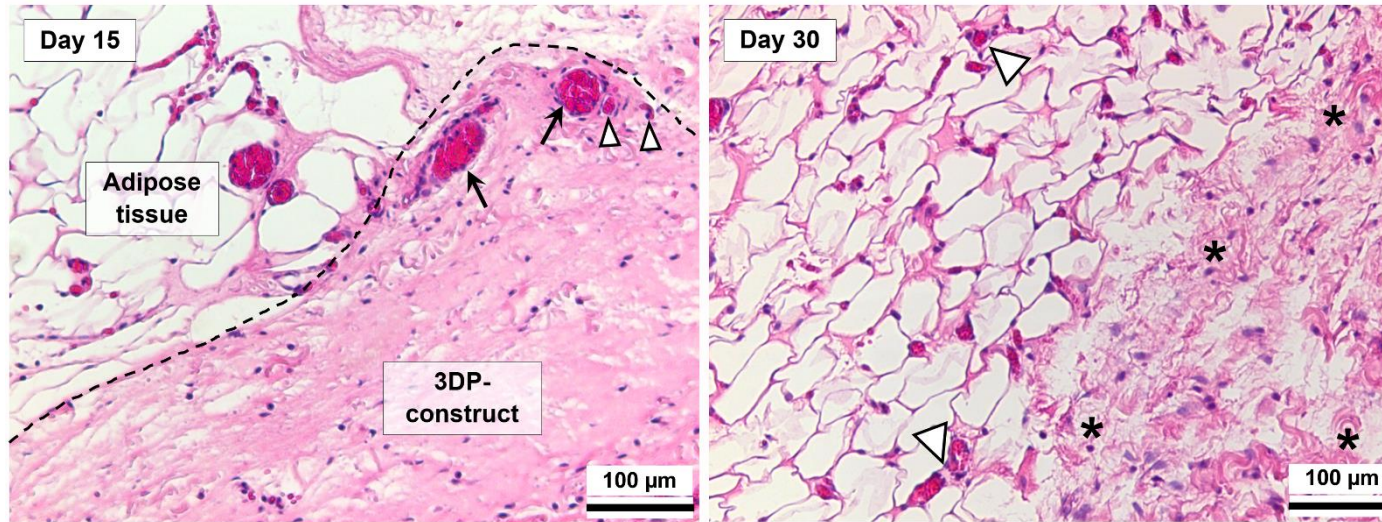

**Fig. S3.** Histologic evaluation of 3D-bioprinted acellular constructs subcutaneously implanted into the epigastric groin fascia of Wistar rats demonstrating a moderate level of inflammatory process during biodegradation. Host cell infiltration is evident inside the construct leading to a gradual degradation from the periphery (dashed line) where capillaries (white triangles) and small blood vessels (arrows) are prevalently visible (Day 15). Remnants of the construct at Day 30 are indicated with star symbol (H&E staining). Scale bars= 100 µm.

**Development of a multicellular 3D-bioprinted microtissue model of human periodontal ligament-alveolar bone biointerface: Towards a pre-clinical model of periodontal diseases and personalized periodontal tissue engineering**

Vurat M. T., Şeker Ş., Lalegül-Ülker Ö., Parmaksız M., Elçin A. E., Elçin Y. M.

**Suppl. Table 1.** The optimal process parameters for 3D-bioprinting.

| Parameter                            | Value                |
|--------------------------------------|----------------------|
| Gel-MA concentration                 | 12.5% w/v            |
| Radical photoinitiator concentration | 0.5% w/v             |
| Printing speed                       | 5 mm s <sup>-1</sup> |
| Extrusion pressure                   | 50-55 kPa            |
| Printing temperature                 | 25 °C                |
| Cartridge temperature                | 25 °C                |
| Nozzle (inner) diameter              | 0.20 mm              |
| UV exposure time                     | 120 sec              |
